# Supplementary material for: Reinforcement Mechanism of Carbon Black-Filled Rubber Nanocomposite as Revealed by Atomic Force Microscopy Nanomechanics
Source: MDPI journal article supplement (doi:10.3390/polym13223922), 2021-11-12
Supplement: s1 [file s1]

Article

# Reinforcement Mechanism of Carbon Black-Filled Rubber Nanocomposite as Revealed by Atomic Force Microscopy Nanomechanics

Xiaobin Liang \*, Makiko Ito and Ken Nakajima

Department of Chemical Science and Engineering, Tokyo Institute of Technology,  
2-12-1 Ookayama, Meguro-ku, Tokyo 152-8552, Japan; ito.m.av@m.titech.ac.jp (M.I.);  
knakaji@mac.titech.ac.jp (K.N.)

\* Correspondence: liang.x.ac@m.titech.ac.jp; Tel.: +81-3-5734-2944

**Citation:** Liang, X.; Ito, M.; Nakajima, K. Reinforcement Mechanism of Carbon Black-Filled Rubber Nanocomposite as Revealed by Atomic Force Microscopy Nanomechanics. *Polymers* **2021**, *13*, 3922. <https://doi.org/10.3390/polym13223922>

Academic Editor(s): Marcin Maslowski

Received: 15 October 2021

Accepted: 9 November 2021

Published: 12 November 2021

**Publisher's Note:** MDPI stays neutral with regard to jurisdictional claims in published maps and institutional affiliations.

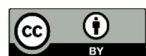

**Copyright:** © 2021 by the authors. Licensee MDPI, Basel, Switzerland. This article is an open access article distributed under the terms and conditions of the Creative Commons Attribution (CC BY) license (<http://creativecommons.org/licenses/by/4.0/>).

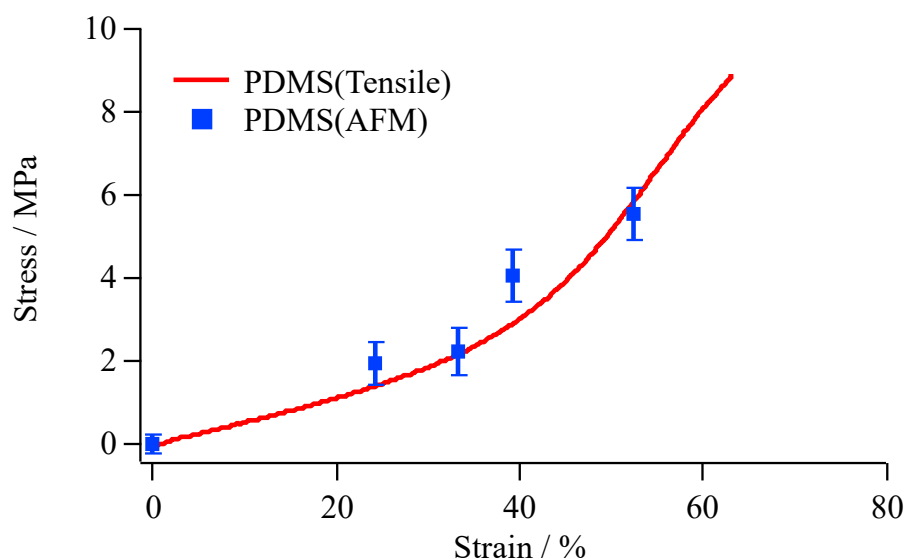

**Figure S1.** Comparison of macroscopic tensile stress curves and microscopic stresses for PDMS. The two are almost identical, which proves that our analytical model is correct.

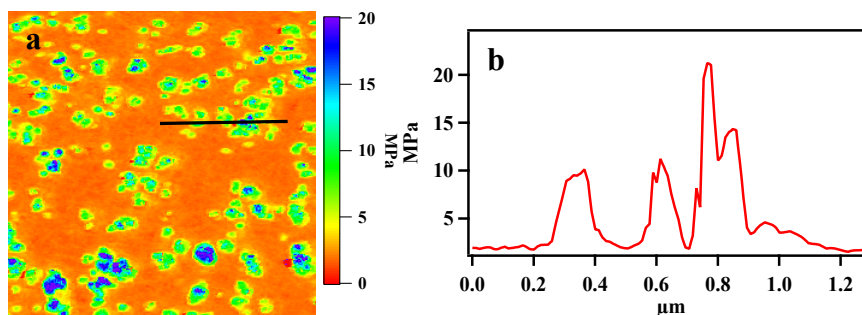

**Figure S2.** (a) Young's modulus mapping of HAF-CB (4.9%) reinforced IR obtained by PeakForce QNM AFM. (b) Section analysis of Young's modulus.

**Table S1.** Young's modulus  $E_{unstr}$ ,  $E_{str}$  of deformed and undeformed rubber for PDMS, and stresses  $\sigma$  calculated by Equation 3.

| Strain %    | 0                 | 24                | 33                | 39                | 53                |
|-------------|-------------------|-------------------|-------------------|-------------------|-------------------|
| $E_{unstr}$ | $3.8 \pm 0.2$ MPa | -                 | -                 | -                 | -                 |
| $E_{str}$   | -                 | $5.7 \pm 0.4$ MPa | $6.0 \pm 0.5$ MPa | $7.9 \pm 0.5$ MPa | $9.4 \pm 0.5$ MPa |
| $\sigma$    | 0                 | $1.9 \pm 0.5$ MPa | $2.2 \pm 0.6$ MPa | $4.1 \pm 0.6$ MPa | $5.6 \pm 0.6$ MPa |

**Table S2.** Local stress distribution of interface and rubber regions for CB/IR of CB (4.9vol%) and CB (13.2vol%).

| Strain % | $\sigma_M$ -CB(4.9vol%) | $\sigma_{IF}$ -CB(4.9vol%) | $\sigma_M$ -CB(13.2vol%) | $\sigma_{IF}$ -CB(13.2vol%) |
|----------|-------------------------|----------------------------|--------------------------|-----------------------------|
| 25       | 0.4 MPa                 | 1.6 MPa                    | 0.4 MPa                  | 1.5 MPa                     |
| 50       | 0.5 MPa                 | 1.9 MPa                    | 0.8 MPa                  | 3.0 MPa                     |
| 100      | 0.7 MPa                 | 2.0 MPa                    | 1.4 MPa                  | 4.1 MPa                     |
| 200      | 1.6 MPa                 | 2.9 MPa                    | 2.2 MPa                  | 4.2 MPa                     |
| 300      | 2.5 MPa                 | 4.9 MPa                    | 4.0 MPa                  | 7.8 MPa                     |
| 400      | 3.0 MPa                 | 6.7 MPa                    | 4.3 MPa                  | 12.8 MPa                    |
| 500      | 4.9 MPa                 | 9.8 MPa                    | 6.1 MPa                  | 14.8 MPa                    |
